# Supplementary material
Source: publisher figshare collection journal article supplement (https://sage.figshare.com/ndownloader/files/18238508)
Supplement: Supplementary file 1 [file 18238508]

## Tables

**Table 1 Sample size and response rates in the ministry and agency surveys, 1976, 1986, 1996, 2006 and 2016**

|       | Ministry  |    | Agency    |    |
|-------|-----------|----|-----------|----|
|       | Responses | %  | Responses | %  |
| 1976  | 784       | 72 | -         | -  |
| 1986  | 1185      | 72 | 1072      | 68 |
| 1996  | 1497      | 72 | 1024      | 64 |
| 2006  | 1874      | 67 | 1452      | 59 |
| 2016  | 2322      | 60 | 1963      | 60 |
| Total | 7662      |    | 5511      |    |

**Table 2 Number of officials in ministries and agencies over time\***

|            | 1976 | 1986 | 1996 | 2006  | 2016  |
|------------|------|------|------|-------|-------|
| Ministries | 2812 | 3491 | 3945 | 4350  | 4752  |
| Agencies   | -    | -    | 9182 | 11040 | 15359 |

\*Comparable numbers are missing for agencies in 1976 and 1986 (Christensen et al. 2018: 27).

**Table 3 Civil servants in ministerial departments who report that the following institutions are fairly or very important when important decision are made within own dossier (percent)\***

|                                                | 1976 | 1986 | 1996 | 2006 | 2016 |
|------------------------------------------------|------|------|------|------|------|
| Own ministry                                   | 93   | 96   | 95   | 95   | 96   |
| Own subordinated agencies, public enterprises  | 48   | 45   | 50   | 61   | 65   |
| Own regional and local agencies                | 46   | 48   | 25   | 22   | 24   |
| Other ministries                               | 57   | 58   | 62   | 60   | 69   |
| Regional and local administration              | 32   | 24   | 20   | 15   | 17   |
| The Parliament                                 | 67   | 71   | 77   | 71   | 76   |
| The Government                                 | 73   | 82   | 83   | 84   | 87   |
| Employee organizations                         | 48   | 20   | 16   | 16   | 12   |
| Interest organizations                         | 16   | 25   | 21   | 20   | 20   |
| Consultancies/think-thanks                     | -    | -    | -    | -    | 7    |
| Private business                               | 12   | 14   | 9    | 9    | 10   |
| Research and educational institutions          | 24   | 28   | 24   | 30   | 32   |
| Mass media                                     | 18   | 22   | 26   | 33   | 22   |
| The European Commission                        | -    | -    | 17   | 20   | 18   |
| The EU Council                                 | -    | -    | -    | -    | 11   |
| The EU Parliament                              | -    | -    | -    | -    | 10   |
| EU agencies                                    | -    | -    | 11   | 8    | 7    |
| Other international governmental organizations | 14   | 19   | 15   | 17   | 19   |

\*The original value scale in the survey: Very important (value 1), fairly important (value 2), both/and (value 3), fairly unimportant (value 4), very unimportant (value 5), don't know/not relevant (value 6).

**Table 4 Civil servants in agencies who report that the following institutions are fairly or very important when important decision are made within own dossier (percent)\***

|                                                | 1976 | 1986 | 1996 | 2006 | 2016 |
|------------------------------------------------|------|------|------|------|------|
| Own agency                                     | -    | 87   | 75   | 76   | 81   |
| Own parent ministry                            | -    | 64   | 69   | 75   | 78   |
| Own regional and local agencies                | -    | 41   | 48   | 35   | 43   |
| Other ministries and agencies                  | -    | 26   | 27   | 27   | 34   |
| Regional and local administration              | -    | 13   | 13   | 15   | 17   |
| The Parliament                                 | -    | 53   | 47   | 52   | 51   |
| The Government                                 | -    | 50   | 45   | 54   | 56   |
| Employee organizations                         | -    | 37   | 17   | 14   | 15   |
| Interest organizations                         | -    | 22   | 16   | 17   | 16   |
| Private business                               | -    | 20   | 17   | 15   | 15   |
| Research and educational institutions          | -    | 25   | 25   | 27   | 25   |
| Mass media                                     | -    | 19   | 21   | 26   | 17   |
| The European Commission                        | -    | -    | 12   | 17   | 20   |
| The EU Council                                 | -    | -    | -    | -    | 8    |
| The EU Parliament                              | -    | -    | -    | -    | 8    |
| EU agencies                                    | -    | -    | -    | 11   | 13   |
| Other international governmental organizations | -    | 16   | 13   | 14   | 11   |

\*The original value scale in the survey: Very important (value 1), fairly important (value 2), both/and (value 3), fairly unimportant (value 4), very unimportant (value 5), don't know/not relevant (value 6).

**Table 5 Civil servants in ministerial departments who report that own unit has succeeded fairly much or very much in influencing the following institutions (percent)\***

|                                   | 1976 | 1986 | 1996 | 2006 | 2016 |
|-----------------------------------|------|------|------|------|------|
| The Government                    | 66   | 57   | 61   | 64   | 68   |
| The Parliament                    | 65   | 52   | 53   | 55   | 59   |
| Own ministry                      | -    | 71   | 77   | 79   | 81   |
| Other ministries                  | 54   | 32   | 44   | 51   | 57   |
| Own subordinate agencies          | 65   | 57   | 62   | 65   | 65   |
| Regional and local administration | -    | 22   | 24   | 17   | 16   |
| The European Commission           | -    | -    | 11   | 11   | 9    |

\* The original value scale in the survey: Very much (value 1), fairly much (value 2), both/and (value 3), fairly little (value 4), very little (value 5), don't know/not relevant (value 6).

**Table 6 Civil servants in agencies who report that own unit has succeeded fairly much or very much in influencing the following institutions (percent)\***

|                | 1976 | 1986 | 1996 | 2006 | 2016 |
|----------------|------|------|------|------|------|
| The Government | -    | 34   | 41   | 45   | 40   |

|                                   |   |    |    |    |    |
|-----------------------------------|---|----|----|----|----|
| The Parliament                    | - | 32 | 37 | 41 | 39 |
| Own parent ministry               | - | 48 | 60 | 64 | 62 |
| Other ministries and agencies     | - | 17 | 20 | 27 | 24 |
| Own regional and local agencies   | - | -  | -  | 44 | 41 |
| Regional and local administration | - | 17 | 16 | 25 | 23 |
| The European Commission           | - | -  | 5  | 9  | 7  |
| EU agencies/ EU agency networks   | - | -  | -  | -  | 8  |

\* The original value scale in the survey: Very much (value 1), fairly much (value 2), both/and (value 3), fairly little (value 4), very little (value 5), don't know/not relevant (value 6).

**Table 7 Civil servants within ministerial departments characterizing coordination as fairly good or very good within their own policy area along the following dimensions (percent)\***

|  |      |      |
|--|------|------|
|  | 2006 | 2016 |
|--|------|------|

|                                                                  |    |    |
|------------------------------------------------------------------|----|----|
| Between different government institutions within own policy area | 59 | 64 |
| With government institutions in other policy areas               | 35 | 38 |
| With regional and local authorities                              | 16 | 16 |
| With supranational/international organizations                   | 33 | 34 |
| With private sector/civil society                                | 24 | 27 |

\* The original value scale in the survey: Very good (value 1), fairly good, value 2), both/an (value 3), fairly bad (value 4), very bad (value 5), not relevant (value 6).

**Table 8 Civil servants within agencies characterizing coordination as fairly good or very good within their own policy area along the following dimensions (percent)\***

|                                                                  | 2006 | 2016 |
|------------------------------------------------------------------|------|------|
| Between different government institutions within own policy area | 43   | 44   |
| With government institutions in other policy areas               | 22   | 22   |
| With regional and local authorities                              | 18   | 18   |
| With supranational/international organizations                   | 30   | 25   |

\* The original value scale in the survey: Very good (value 1), fairly good, value 2), both/an (value 3), fairly bad (value 4), very bad (value 5), not relevant (value 6).

**Table 9 Civil servants' characterization of mutual trust relationships between ministries and agencies within their own policy area (percent)\***

|  | 2006 | 2016 |
|--|------|------|
|  |      |      |

|                                                                                          |    |    |
|------------------------------------------------------------------------------------------|----|----|
| Ministry officials: Trust between own ministry and subordinate agencies and institutions | 70 | 69 |
| Agency officials: Trust between own agency and own parent ministry                       | 74 | 74 |

\* The original value scale in the survey: very good (value 1), fairly good (value 2), both/and (value 3), fairly bad (value 4), very bad (value 5), don't know (value).

**Table 10 Summary of factors affecting officials' reported influence vis-a-vis own institution (own ministry/own agency) and the Government (standardized beta coefficients; linear regressions on ministry and agency officials; 2016 data)<sup>a, b</sup>**

|                                                                      | Influence on own institution<br>(own ministry/own agency) | Influence on the<br>Government |
|----------------------------------------------------------------------|-----------------------------------------------------------|--------------------------------|
| Vertical inter-organizational<br>specialization<br>(ministry/agency) | -.25**                                                    | -.23**                         |
| Vertical intra-organizational<br>specialization (rank)               | -.09**                                                    | -.12**                         |
| Organizational affiliation<br>(seniority)                            | .05*                                                      | .04                            |

\*  $p \leq 0.05$  \*\* $p \leq 0.01$

a) Coding of the dependent variable: The original value scale in the survey: Very much (value 1), fairly much (value 2), both/and (value 3), fairly little (value 4), very little (value 5), don't know/not relevant (value 6).

b) Coding of the independent variables: Vertical inter-organizational specialization: ministry (value 1), agency (value 0); Vertical intra-organizational specialization (Director General or higher levels/adviser/Director or equivalent (value 1), Deputy director general (value 2), Assistant director general/adviser (value 3), Principal officer/adviser (value 4), Executive officer, Higher executive officer/adviser (value 5); Organizational affiliation (natural continuous variable).
